# Supplementary figures and images for: Origin and Evolution of the 2019 Novel Coronavirus
Source: Oxford University Press journal article supplement (doi:10.1093/cid/ciaa112), 2020-01-31

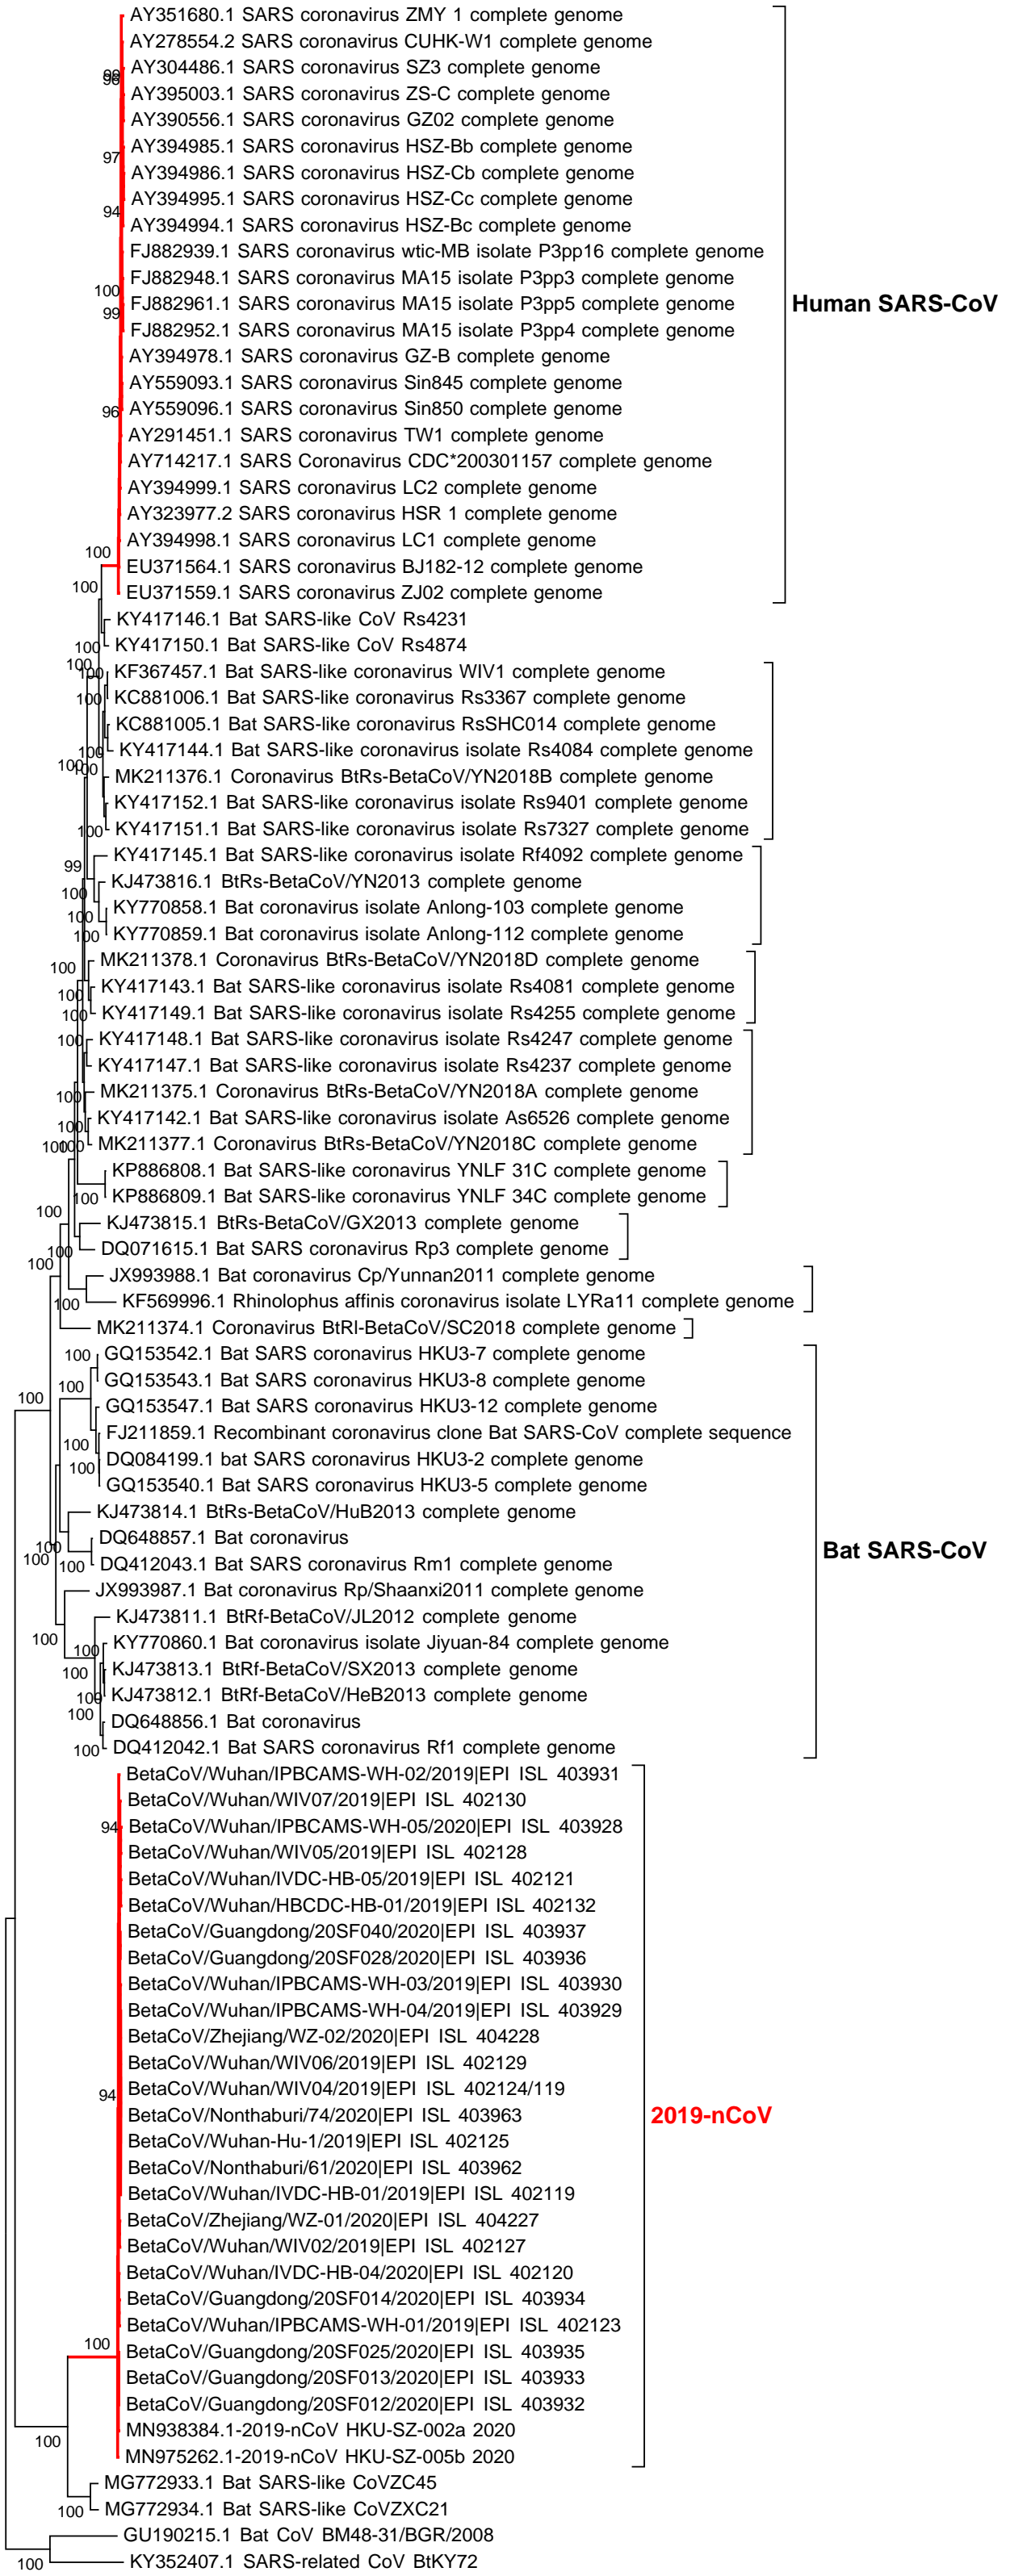

Supplement: ciaa112_suppl_supplementary_figure_1.pdf [file ciaa112_suppl_supplementary_figure_1.pdf]
